# Supplementary material
Source: PubMed Central journal article supplement (PMC4058328)
Supplement: NIHMS530757-supplement-1_si_001.pdf [file NIHMS530757-supplement-1_si_001.pdf]

Molecular Recognition in a Diverse Set of Protein-Ligand Interactions Studied with Molecular Dynamics Simulations and End-Point Free Energy Calculations

Bo Wang,<sup>2,3</sup> Liwei Li,<sup>1</sup> Thomas D. Hurley,<sup>1</sup> and Samy O. Meroueh<sup>1,2,3,4</sup>

<sup>1</sup>Indiana University Department of Biochemistry and Molecular Biology, <sup>2</sup>Center for Computational Biology and Bioinformatics, <sup>3</sup>Department of Chemistry and Chemical Biology (IUPUI), <sup>4</sup>Stark Neurosciences Research Institute

Indiana University School of Medicine, 535 Barnhill Drive, Indianapolis, IN, 46202

**Corresponding Author:** Samy Meroueh  
Department of Biochemistry and Molecular Biology  
Indiana University School of Medicine  
410 W. 10<sup>th</sup> Street, HITS 5000  
Indianapolis, IN 46202  
Tel. (317) 274-8315  
Fax: (317) 278-9217  
E-mail: smeroueh@iupui.edu

## SUPPORTING INFORMATION

**Table S1. Atom Types Used in Developing Knowledge-Based Pair Potentials**

| Atom Types |        | Description                                 | Atom Types |        |                |
|------------|--------|---------------------------------------------|------------|--------|----------------|
| Protein    | Ligand |                                             | Protein    | Ligand |                |
| C.3        | c.3    | Carbon sp3                                  | O.3        | o.3    | Ox             |
| C.2        | c.2    | Carbon sp2                                  | O.2        | o.2    | Ox             |
| C.AR       | c.ar   | Carbon aromatic, sp1                        | O.CO2      | o.co2  | Ox<br>ar       |
| C.CAT      | c.cat  | Carbocation                                 | P.3        | p.3    | Ph<br>su<br>su |
| N.4        | n.4    | Nitrogen sp3, and sp3<br>positively charged | S.3        | s.3    | Su             |
| N.AM       | n.am   | Nitrogen amide                              | MET        | -      | Al             |
| N.PL3      | n.pl3  | Nitrogen trigonal                           | -          | f      | Fl             |
| N.2        | -      | Nitrogen sp1, sp2 and<br>aromatic           | -          | cl     | Cl             |
| -          | n.2    | Nitrogen sp1and sp2                         |            |        |                |
| -          | n.ar   | Nitrogen aromatic                           |            |        |                |

**Table S2. Parameters Used in MM-PBSA/MM-GBSA Calculations.**

| <b>Parameters</b>                                                                                                                              | <b>Values</b>                       |
|------------------------------------------------------------------------------------------------------------------------------------------------|-------------------------------------|
| <b>PB (free energies calculation using <i>pbsa</i>)</b>                                                                                        |                                     |
| Method used for solving the PB equation. (PROC)                                                                                                | 2 ( <i>pbsa</i> program)            |
| Reference state taken for PB calculation. (REFE)                                                                                               | 0                                   |
| Dielectric constant for the solute. (INDI)                                                                                                     | 1.0 (2-10,15,20, agreed with DIELC) |
| Dielectric constant for the surrounding solvent. (EXDI)                                                                                        | 80.0                                |
| Ionic strength (in mM) for the Poisson-Boltzmann solvent. (ISTRING)                                                                            | 0.0                                 |
| Solvent probe radius in Angstrom. (PRBRAD)                                                                                                     | 1.6                                 |
| Option to set up radii for PB calculation. (RADIOPT)                                                                                           | 0                                   |
| Lattice spacing in number of grids per Angstrom. (SCALE)                                                                                       | 2                                   |
| Number of iterations with linear PB equation. (LINIT)                                                                                          | 1000                                |
| Values used to compute the nonpolar contribution $G_{NP}$ to the desolvation according to $G_{NP} = SURFTEN * SASA + SURFOFF$ (SURFEN/SURFOFF) | 0.0072/0.00                         |
| <b>GB (free energies calculation using GB model in <i>sander</i>)</b>                                                                          |                                     |

|                                                                                                                                                |                   |
|------------------------------------------------------------------------------------------------------------------------------------------------|-------------------|
| GB model. (IGB)                                                                                                                                | 2 (Onufriev's GB) |
| Method used for SASA calculation. (GBSA)                                                                                                       | 2 (ICOSA)         |
| Concentration (in M) of 1-1 mobile counterions in solution. (SALTCON)                                                                          | 0.00              |
| Dielectricity constant for the surrounding solvent. (EXTDIEL)                                                                                  | 80.0              |
| Dielectricity constant for the solute. (INTDIEL)                                                                                               | 1.0               |
| Values used to compute the nonpolar contribution $G_{NP}$ to the desolvation according to $G_{NP} = SURFTEN * SASA + SURFOFF$ (SURFEN/SURFOFF) | 0.0072/0.00       |
| <b>MM (gas phase energies calculation using <i>sander</i>)</b>                                                                                 |                   |
| Dielectric constant for electrostatic interactions. (DIELC)                                                                                    | 1 (2-10,15,20,)   |
| <b>MS (nonpolar contributions calculation using <i>molsurf</i>)</b>                                                                            |                   |
| Radius of the probe sphere used to calculate the SAS. (PROBE)                                                                                  | 0.0               |
| <b>NM (entropies calculation with <i>nmode</i>)</b>                                                                                            |                   |
| Distance-dependent dielectric constant. (DIELC)                                                                                                | 4                 |
| Maximum number of cycles of minimization. (MAXCYC)                                                                                             | 10000             |
| Convergence criterion fro the energy gradient. (DRMS)                                                                                          | 0.0001            |

Figure S1

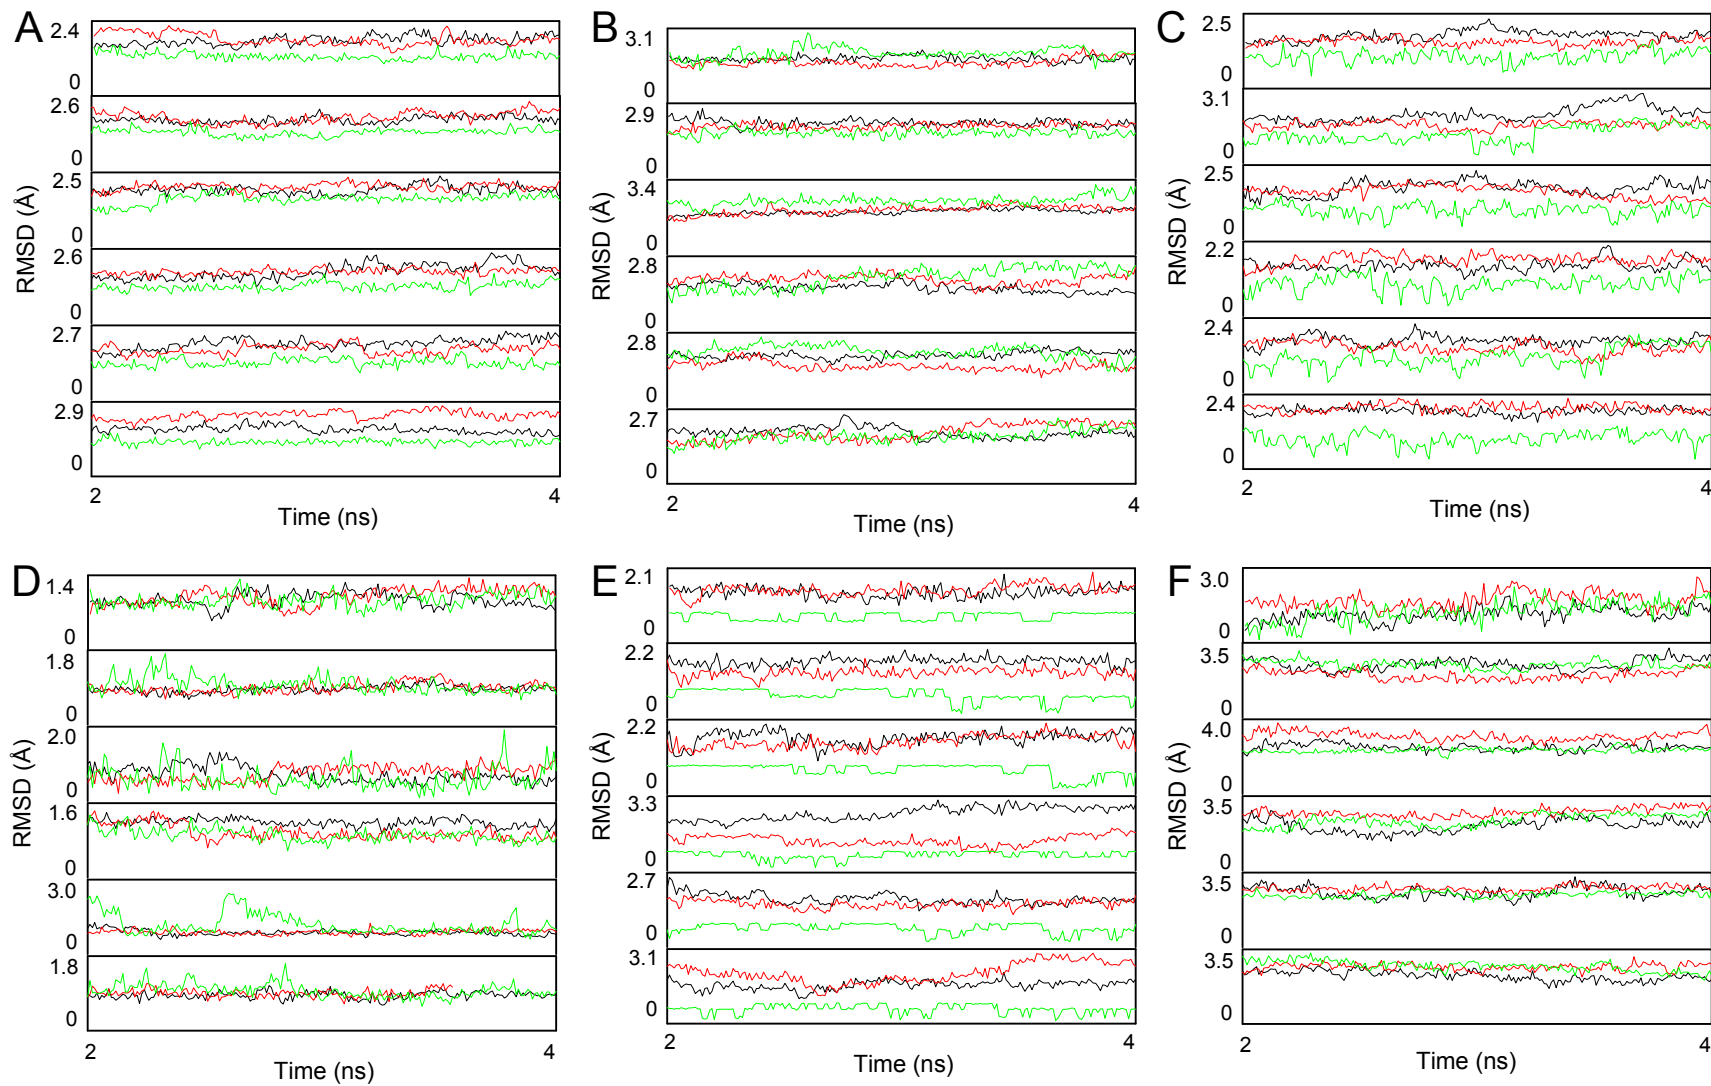

**Figure S1. Comparison of dynamics of the free ligand and protein to the protein-ligand complex.** RMSDs of atoms of MD simulations. Atoms of binding pocket (5.5 Å distance around ligand) for protein-ligand complexes are illustrated in black, atoms of binding pocket for apo proteins are illustrated in red, atoms in ligands are illustrated in green. Each MD simulation consists of six separate trajectories of 2 ns (12 ns total) from top to bottom; (A) **4** bound to HIV-1 protease (1HXW); (B) **5** bound to leukocyte function-associated antigen-1 (1RD4); (C) **7** bound to mouse major urinary protein 6 (1I06); (D) **10** bound to hen lysozyme C (1LZB); (E) **13** bound to bovine pancreatic trypsin (1S0R); and (F) **14** bound to human brain fatty acid-binding protein (1FDQ).
